# Supplementary material for: Photoinduced viscosity control of lecithin-based reverse wormlike micellar systems using azobenzene derivatives
Source: Royal Society of Chemistry journal article supplement (doi:10.1039/c8ra04690e), 2018-01-01
Supplement: c8ra04690e1.pdf [file c8ra04690e1.pdf]

## **Photoinduced Viscosity Control of Lecithin-Based Reverse Wormlike Micellar Systems Using Azobenzene Derivatives**

Masaaki Akamatsu,\*<sup>1</sup> Mayu Shiina,<sup>1</sup> Rekha Goswami Shrestha,<sup>1</sup> Kenichi Sakai,<sup>1, 2</sup>  
Masahiko Abe,<sup>2</sup> and Hideki Sakai \*<sup>1, 2</sup>

<sup>1</sup>Department of Pure and Applied Chemistry, Faculty of Science and Technology, Tokyo University of Science, 2641 Yamazaki, Noda, Chiba 278-8510, Japan

<sup>2</sup>Research Institute for Science and Technology, Tokyo University of Science, 2641 Yamazaki, Noda, Chiba 278-8510, Japan

### **Supplementary Information**

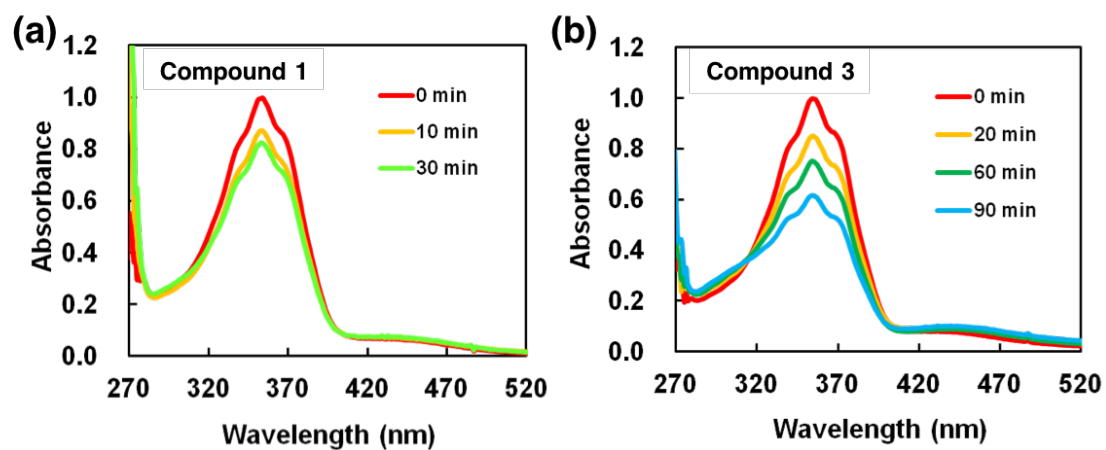

**Figure S1.** Variations in UV/vis absorption spectra of 105 mM SoyPC/55 mM D-ribose/decane solutions containing **1** (a) or **3** (b) after UV light irradiation.

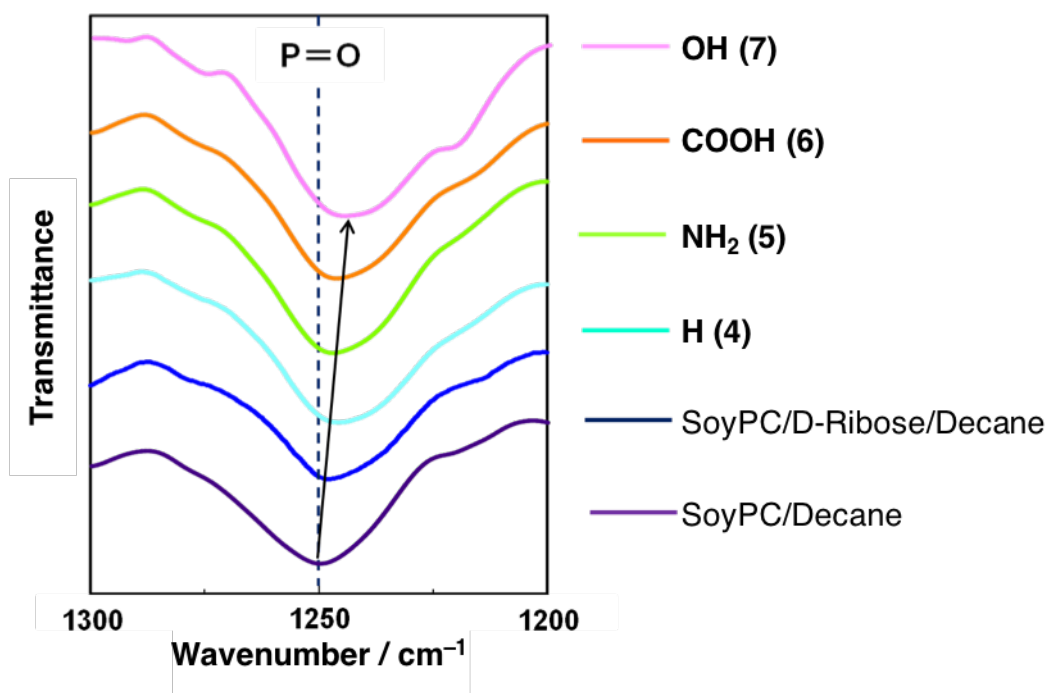

**Figure S2.** Infrared absorption spectra of SoyPC/decane solution with D-ribose, or azobenzene derivative 4–7.

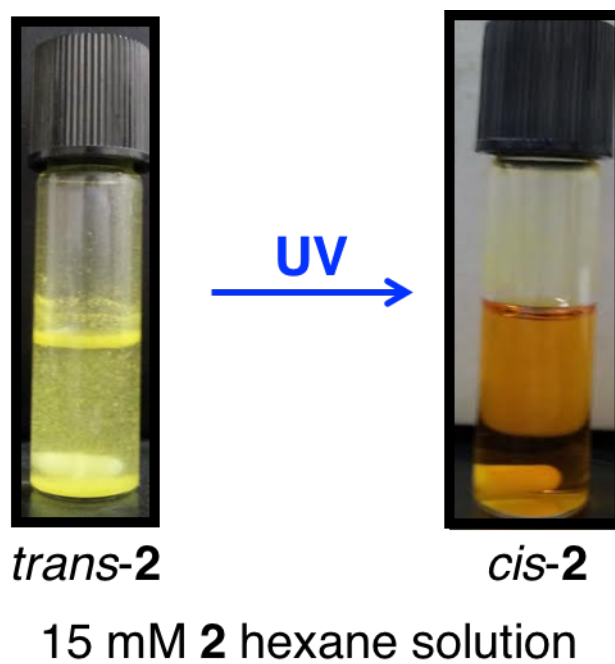

**Figure S3.** Photographs of the mixture of **2** (15 mM) and decane before and after UV light irradiation.

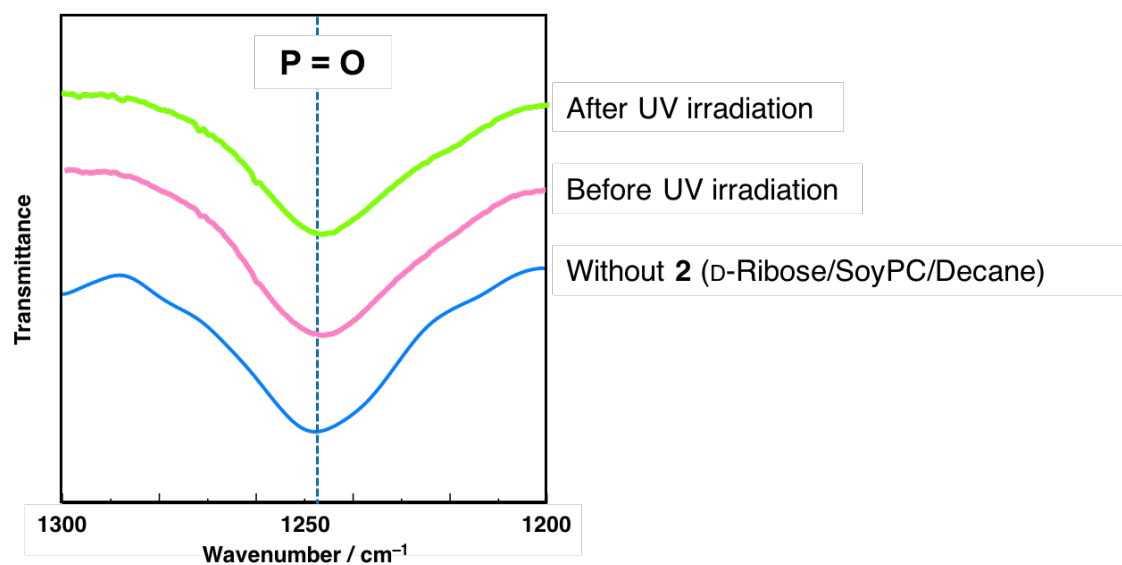

**Figure S4.** Infrared absorption spectra of **2**/D-ribose/SoyPC/decane mixture.

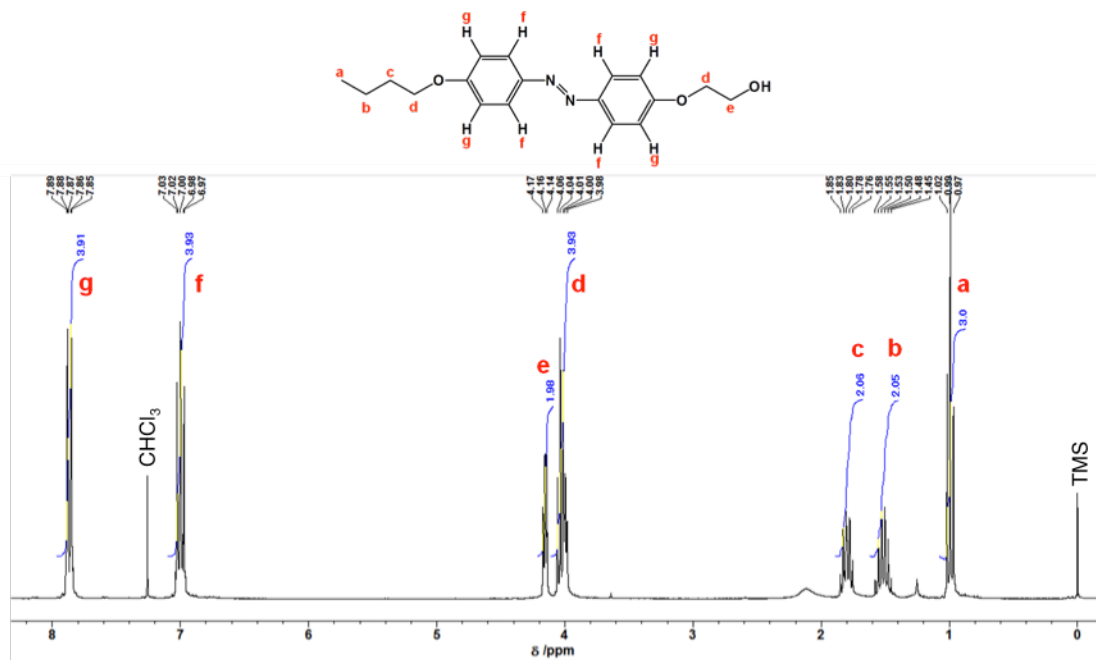

Figure S5. <sup>1</sup>H-NMR spectrum of **1** in CDCl<sub>3</sub>.

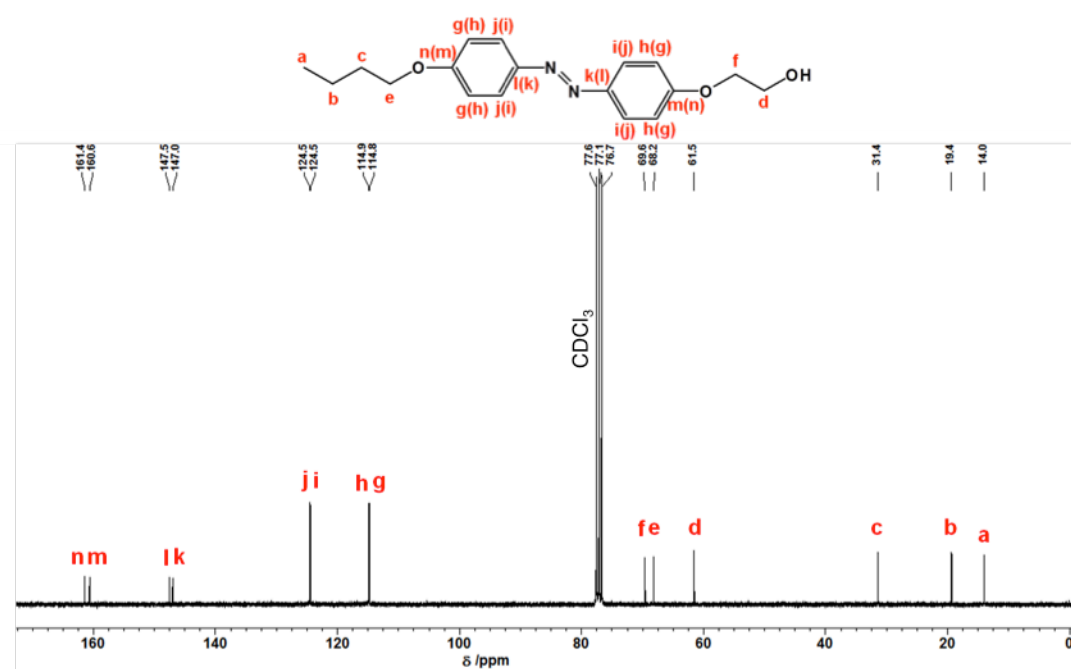

Figure S6. <sup>13</sup>C-NMR spectrum of **1** in CDCl<sub>3</sub>.

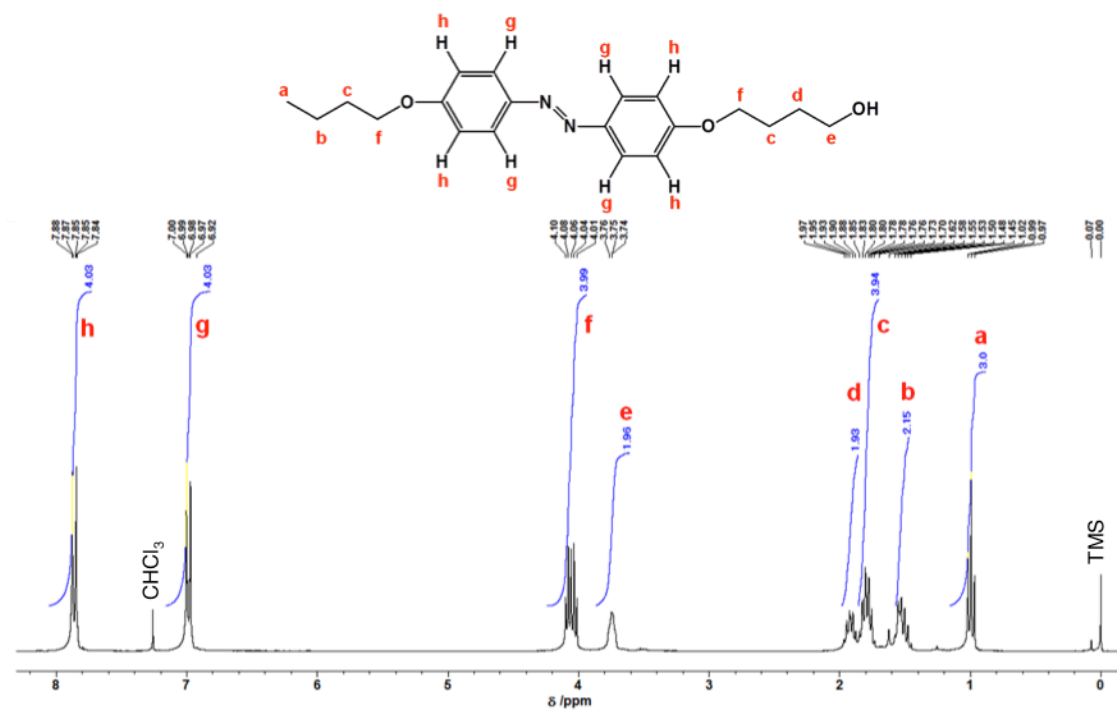

**Figure S7.**  $^1\text{H}$ -NMR spectrum of **2** in  $\text{CDCl}_3$ .

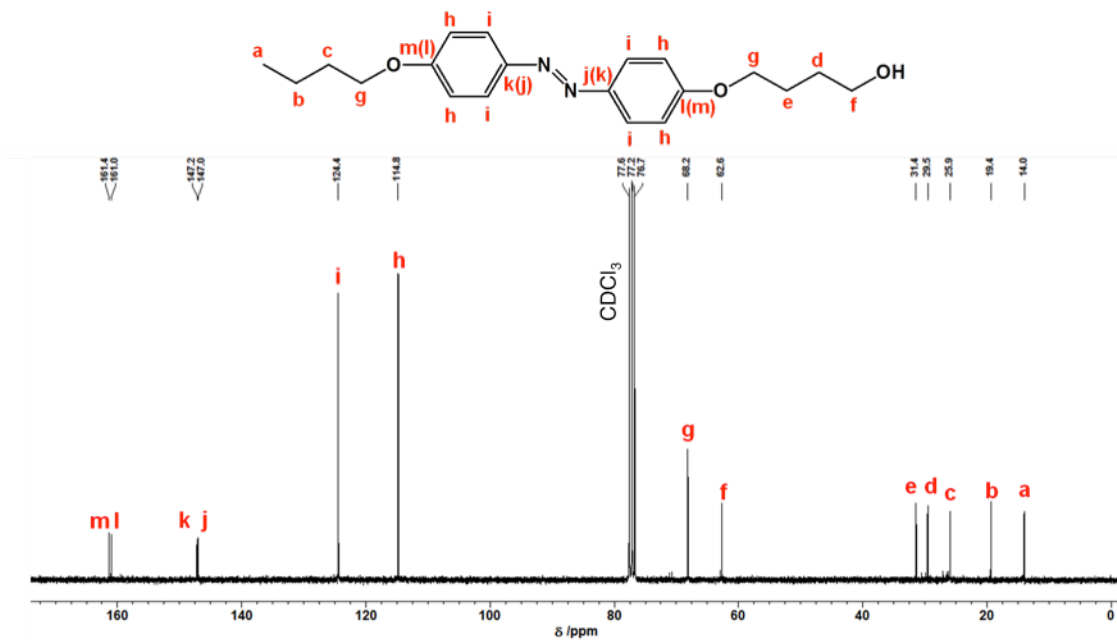

**Figure S8.**  $^{13}\text{C}$ -NMR spectrum of **2** in  $\text{CDCl}_3$ .

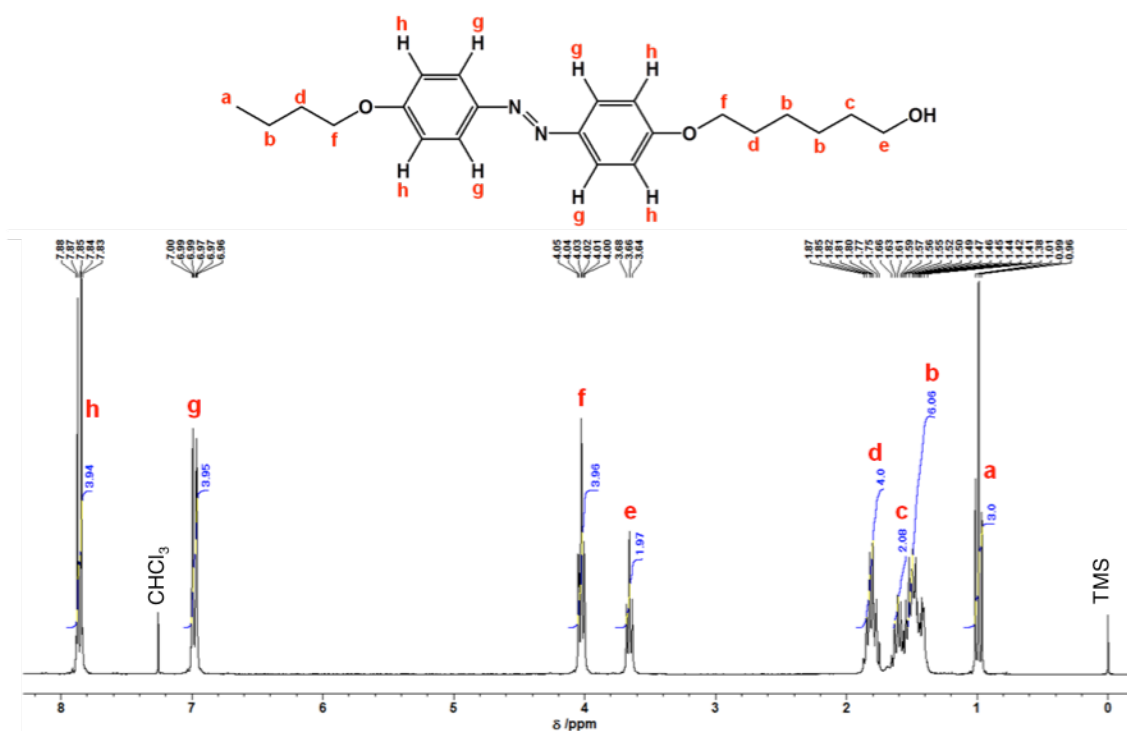

Figure S9. <sup>1</sup>H-NMR spectrum of **3** in CDCl<sub>3</sub>.

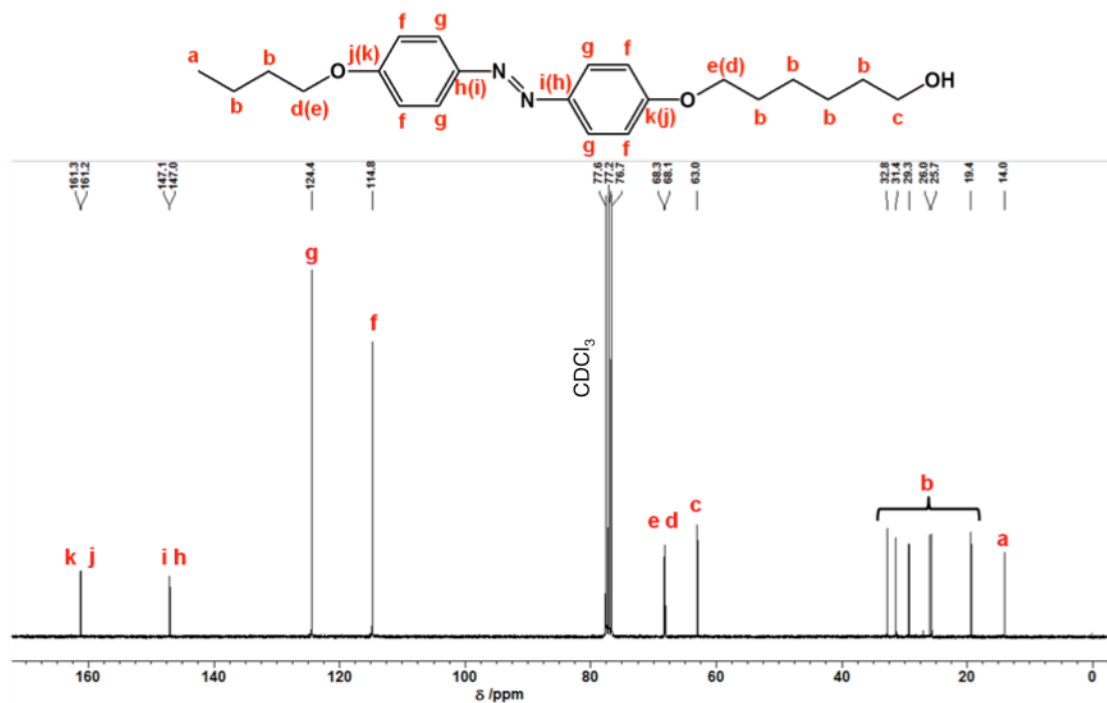

Figure S10. <sup>13</sup>C-NMR spectrum of **3** in CDCl<sub>3</sub>.
